# Supplementary material for: Restraint of melanoma progression by cells in the local skin environment
Source: eLife journal article supplement (doi:10.7554/elife.101974), 2024-10-07
Supplement: fig4-data1 [file Figure_4C_Source_Data_1_TWIST_labled.pdf › Figure_4C_Source_Data_1_TWIST_labled.pdf]

Figure 4 - Source Data 1 - Labeled Western blot image of TWIST1

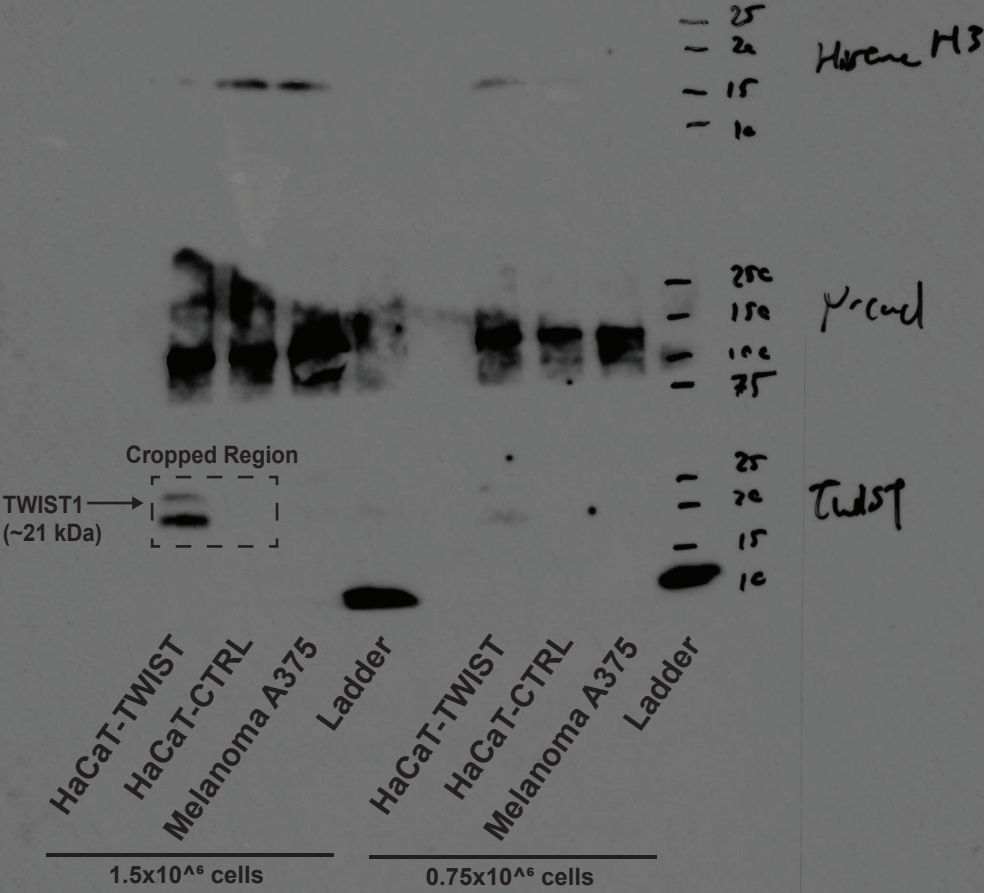

Re-exposure with Pierce™ Western Blot Signal Enhancer

Plot below is reverse of above blot with different exposure time
