# Supplementary material for: Restraint of melanoma progression by cells in the local skin environment
Source: eLife. 2026 Jun 30;13:RP101974. doi: 10.7554/eLife.101974 (PMC13318302; doi:10.7554/eLife.101974)
Supplement: Supplementary file 1. — (A) GeoMx MR annotations. Metadata for each molecular region (MR) included in the reanalysis, comprising scan and ROI identifiers, histopathological classification, anatomical localization, SOX10/MART1-positive melanocyte count, total nuclei count, and comparison group assignment. (B) Biospecimen metadata. Clinical and pathological annotations for each melanoma case, including Breslow thickness, tumor stage, histological subtype, biopsy procedure, anatomical site, age at diagnosis, sex, and relevant oncological history. [file elife-101974-supp1.xlsx]

## Sheet: Table A. GeoMx MR annotations
Scan name	ROI (label)	Segment (Name/ Label)	Segment tags	LOT_Human_NGS_Whole_Transcriptome_Atlas_RNA	ROI_ID	Scan_ID	homogenous_heterogenous	Block	Case__Block	Case	batch	histopathology	localization	melanocyte count	total nuclei count	comparison group
LSP13135_scan1	001	Full ROI	Full ROI	HWTA12002	001	LSP13135_scan1	heterogenous	A1	MEL68 A1	MEL68	1	P	P	5	224	1
LSP13135_scan1	007	Full ROI	Full ROI	HWTA12002	007	LSP13135_scan1	heterogenous	A1	MEL68 A1	MEL68	1	P	P	20	186	2
LSP13135_scan1	008	Full ROI	Full ROI	HWTA12002	008	LSP13135_scan1	heterogenous	A1	MEL68 A1	MEL68	1	P	P	28	131	2
LSP13135_scan1	036	Full ROI	Full ROI	HWTA12002	036	LSP13135_scan1	heterogenous	A2	MEL18 A2	MEL18	1	P	P	36	153	2
LSP13135_scan1	043	Full ROI	Full ROI	HWTA12002	043	LSP13135_scan1	heterogenous	A2	MEL18 A2	MEL18	1	P	P	31	214	1
LSP13140_scan1	002	Full ROI	Full ROI	HWTA12002	002	LSP13140_scan1	heterogenous	A1	MEL47 A1	MEL47	1	P	P	13	108	1
LSP13140_scan1	040	Full ROI	Full ROI	HWTA12002	040	LSP13140_scan1	heterogenous	B2	MEL48 B2	MEL48	1	P	P	66	227	2
LSP13918_scan2	032	SOX10+	sox10+	HWTA21003	032	LSP13918_scan2	heterogenous	C2	MEL35 C2	MEL35	2	N	epidermis	6	168	1

## Sheet: Table B. Biospecimen metadata
Case	Block (if multiple blocks)	Breslow (mm)	Stage	Subtype	procedure	site	Age at Diagnosis	Sex	Years between prior melanoma and current	Location of prior melanoma	History of Other Cancers	Other cancer
MEL18		1.3	IIA	Superficial spreading melanoma	shave	left neck	25	M			Y	rhabdomyosarcoma
MEL35		0	0	Melanoma in situ	punch	left clavicle	85	M			Y	NMSC
MEL47		1.6	IB	Superficial spreading melanoma	shave	left distal upper arm	66	M			Y	SCC, BCC
MEL48		1.5	IB	Superficial spreading melanoma	punch	left posterior neck	68	M			N
MEL68	B1	1.1	IB	Superficial spreading melanoma	punch	left posterior shoulder	64	M	11	left flank	Y	SCC, BCC
MEL68	A1	0	0	Melanoma in situ	punch	central neck	64	M	11	left flank	Y	SCC, BCC
