# Supplementary figures and images for: Restraint of melanoma progression by cells in the local skin environment
Source: eLife journal article supplement (doi:10.7554/elife.101974), 2024-10-07

Figure 4 - Source Data 1 - Labeled Western blot image of Actin

10/09/22

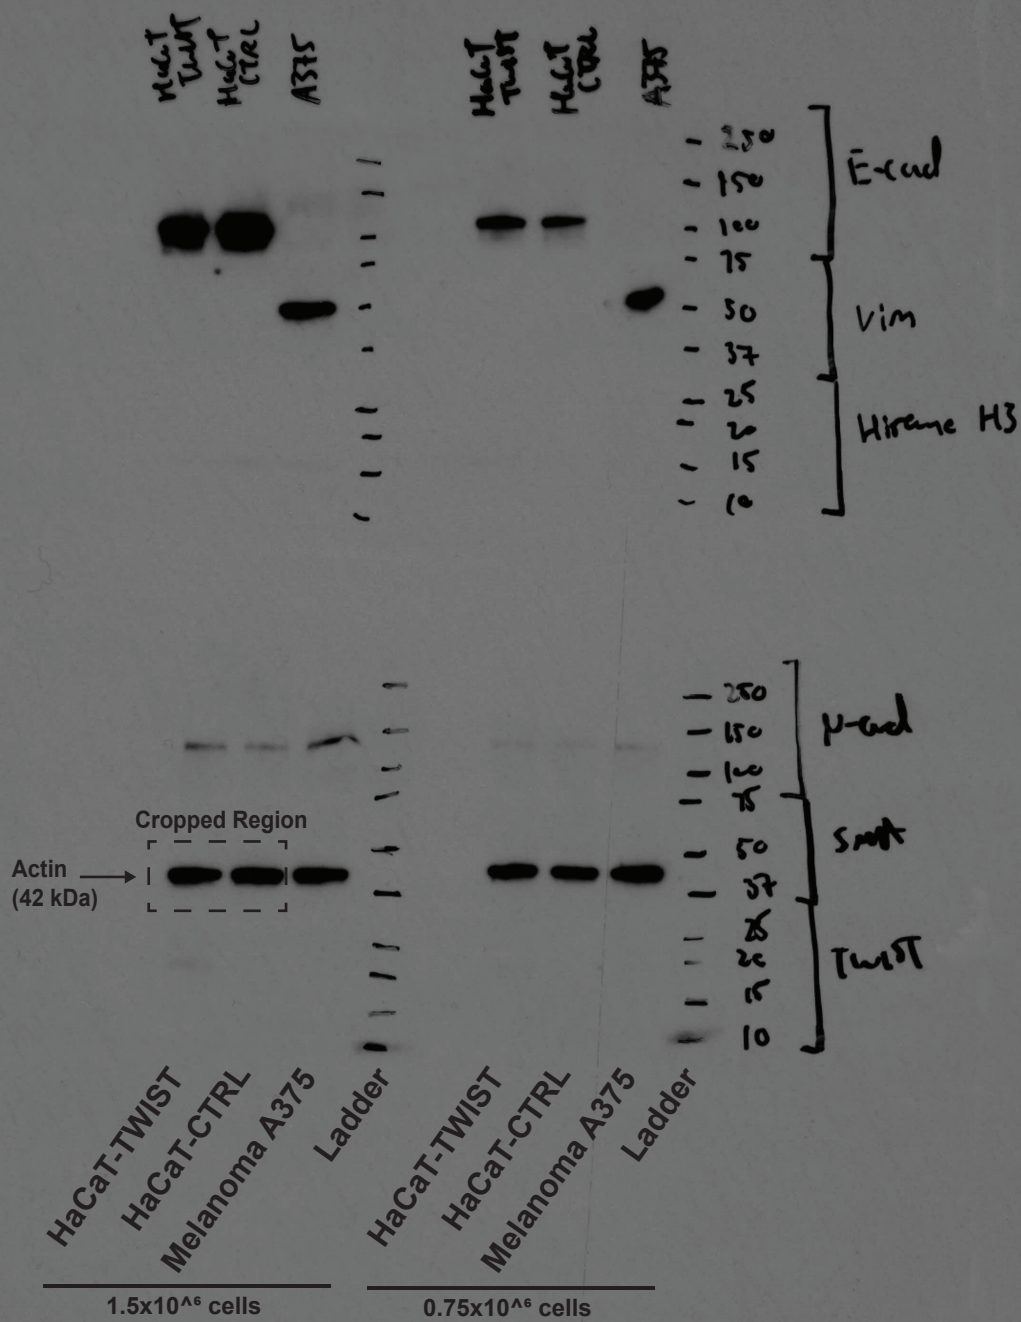

Supplement: fig4-data1 [file Figure_4C_Source_Data_1_Actin_labled.pdf › Figure_4C_Source_Data_1_Actin_labled.pdf]
